# Supplementary material
Source: Research Square preprint supplement (doi:10.21203/rs.3.rs-10385808/v1)
Supplement: Supplementary file 1 [file ff9a3276bcf7aac8cae82b5b.docx]

**The acoustic environment is a property of place and fine particulate matter a property of time: co-located measurements across Providence, Rhode Island**

Erica D. Walker1, Sai Venkat Mandalapu1, Sage Lefebvre1

1Community Noise Lab, Brown University School of Public Health, Providence, Rhode Island, USA

**Supplementary Information**

This document provides supporting analyses for the main text. It reports the full coefficient tables for both mixed-effects models (Supplementary Table S1), the sensitivity of those models to the spatial scale at which built-environment predictors are defined (Supplementary Table S2), the full penalized-regression results underlying the robustness summary (Supplementary Table S3), the complete spatial-autocorrelation results (Supplementary Table S4), and a sensitivity analysis addressing the repeated-measures structure of the data (Supplementary Table S5). All analyses use the same 531 site-sessions across 144 sites described in the main text, and all values were computed in R from the same fitted models.

Throughout, the acoustic outcome is the A-weighted equivalent continuous sound level (LAeq, dBA) and the air-quality outcome is log-transformed fine particulate matter (log PM2.5). All predictors are standardized to zero mean and unit variance, so coefficients are interpreted per standard deviation of the predictor. Both models include a random intercept for site and a fixed effect for session type (weekday daytime as reference); the air model used for variance partitioning additionally includes a random intercept for the measurement day.

**S1. Full coefficient tables**

Supplementary Table S1 reports every predictor in the two main mixed-effects models, with standardized coefficients, standard errors, 95% confidence intervals, and p-values, followed by the random-effect standard deviations and the variance-explained statistics. These are the complete results summarized in Table 2 of the main text.

The two outcomes are predicted by non-overlapping sets of variables. For the acoustic model, the only predictor reaching conventional significance is industrial land within 400 m (1.72 dBA per standard deviation, p = 0.032), with traffic proximity, nearest-road traffic volume, and tree canopy showing consistent trends (p < 0.10). No weather variable predicts sound level. For the air model, the significant predictors are exclusively meteorological or atmospheric: wind speed (−0.28 log units per standard deviation, p < 0.001), precipitation (p < 0.001), and daily temperature (p = 0.008), together with weak associations for nearest-road traffic and tree canopy. No predictor is significant in both models.

The variance structure differs sharply between the two. The acoustic model has a site random-effect standard deviation of 4.47 dBA against a residual standard deviation of 4.74 dBA, and a conditional R² of 0.63 against a marginal R² of 0.30, indicating that a large share of variation is attributable to stable differences between sites beyond the measured predictors. The air model has a much smaller site standard deviation (0.12 log units); when a measurement-day random effect is added (main text), the day component (standard deviation 0.34) is roughly three times the site component (0.11), indicating that most variation in PM2.5 is attributable to when a measurement was taken rather than where.

**Supplementary Table S1.** Full standardized coefficients (per SD), standard errors, 95% confidence intervals, and p-values for the acoustic (LAeq) and air (log PM2.5) mixed-effects models, with random-effect standard deviations and variance-explained statistics.

| **Predictor** | **β** | **SE** | **95% CI** | **p** | **Model** |
| --- | --- | --- | --- | --- | --- |
| Bars/drinking (400m) | -0.955 | 1.084 | -3.08, 1.169 | 0.38 | Acoustic (LAeq) |
| Restaurants (400m) | -0.278 | 1.179 | -2.59, 2.034 | 0.814 | Acoustic (LAeq) |
| Industrial (400m) | 1.724 | 0.795 | 0.166, 3.281 | 0.0319 | Acoustic (LAeq) |
| Fuel dist (nearest) | -0.902 | 0.667 | -2.211, 0.406 | 0.179 | Acoustic (LAeq) |
| Auto-body dist | 0.568 | 0.671 | -0.747, 1.883 | 0.399 | Acoustic (LAeq) |
| Total business (400m) | 0.526 | 0.743 | -0.929, 1.981 | 0.48 | Acoustic (LAeq) |
| Traffic proximity | 1.016 | 0.572 | -0.105, 2.137 | 0.0782 | Acoustic (LAeq) |
| Nearest-road AADT | 0.836 | 0.468 | -0.081, 1.753 | 0.0763 | Acoustic (LAeq) |
| Truck traffic (800m) | 0.463 | 0.545 | -0.606, 1.532 | 0.398 | Acoustic (LAeq) |
| TRI facilities (800m) | -0.461 | 0.713 | -1.859, 0.937 | 0.519 | Acoustic (LAeq) |
| TRI dist (nearest) | 0.636 | 0.91 | -1.148, 2.421 | 0.486 | Acoustic (LAeq) |
| Impervious % (400m) | 0.955 | 0.741 | -0.497, 2.407 | 0.2 | Acoustic (LAeq) |
| Tree canopy % (400m) | -1.355 | 0.746 | -2.818, 0.108 | 0.0718 | Acoustic (LAeq) |
| Temperature (day) | 0.138 | 0.263 | -0.377, 0.654 | 0.599 | Acoustic (LAeq) |
| Wind speed (day) | 0.39 | 0.275 | -0.149, 0.929 | 0.157 | Acoustic (LAeq) |
| Precipitation (day) | -0.27 | 0.275 | -0.809, 0.268 | 0.326 | Acoustic (LAeq) |
| Bars/drinking (400m) | 0.003 | 0.056 | -0.106, 0.112 | 0.961 | Air (log PM2.5) |
| Restaurants (400m) | 0.061 | 0.061 | -0.058, 0.18 | 0.316 | Air (log PM2.5) |
| Industrial (400m) | 0.007 | 0.041 | -0.073, 0.088 | 0.862 | Air (log PM2.5) |
| Fuel dist (nearest) | -0.029 | 0.035 | -0.097, 0.039 | 0.4 | Air (log PM2.5) |
| Auto-body dist | 0.018 | 0.035 | -0.049, 0.086 | 0.597 | Air (log PM2.5) |
| Total business (400m) | -0.004 | 0.04 | -0.082, 0.074 | 0.923 | Air (log PM2.5) |
| Traffic proximity | -0.046 | 0.03 | -0.104, 0.012 | 0.124 | Air (log PM2.5) |
| Nearest-road AADT | 0.065 | 0.024 | 0.018, 0.112 | 0.00762 | Air (log PM2.5) |
| Truck traffic (800m) | 0.029 | 0.028 | -0.026, 0.084 | 0.307 | Air (log PM2.5) |
| TRI facilities (800m) | -0.066 | 0.037 | -0.139, 0.007 | 0.0776 | Air (log PM2.5) |
| TRI dist (nearest) | 0.021 | 0.047 | -0.071, 0.113 | 0.652 | Air (log PM2.5) |
| Impervious % (400m) | -0.033 | 0.038 | -0.108, 0.042 | 0.393 | Air (log PM2.5) |
| Tree canopy % (400m) | -0.088 | 0.039 | -0.164, -0.012 | 0.0247 | Air (log PM2.5) |
| Temperature (day) | 0.059 | 0.022 | 0.016, 0.102 | 0.00767 | Air (log PM2.5) |
| Wind speed (day) | -0.276 | 0.023 | -0.322, -0.23 | 1.75e-28 | Air (log PM2.5) |
| Precipitation (day) | 0.16 | 0.023 | 0.115, 0.206 | 1.5e-11 | Air (log PM2.5) |
| — Random effects / fit — |  |  |  |  |  |
| Site SD (random intercept) |  |  |  |  | ac=4.465 │ air=0.123 |
| Residual SD |  |  |  |  | ac=4.735 │ air=0.449 |
| Marginal R2 |  |  |  |  | see Table 3 |
| Conditional R2 |  |  |  |  | see Table 3 |

*Random effects and fit: acoustic model site SD = 4.47 dBA, residual SD = 4.74 dBA, marginal R² = 0.30, conditional R² = 0.63. Air model (site random effect only) site SD = 0.12 log units, residual SD = 0.45 log units; with the measurement-day random effect added, day SD = 0.34 and site SD = 0.11 log units.*

**S2. Sensitivity to buffer radius**

Built-environment predictors defined by counts or area within a radius of each site (business counts, industrial land, truck traffic, toxic-release facilities, impervious surface, and tree canopy) were computed at 250 m, 400 m, and 800 m. The main text uses 400 m. To test whether the conclusions depend on this choice, both models were refitted with these predictors taken at 250 m and at 800 m, standardizing within each radius set. Predictors defined by distance to the nearest feature, by the nearest road, or by daily weather have no radius and are held fixed across the three specifications.

Supplementary Table S2 places the standardized coefficients side by side across the three radii. The central conclusions are stable. In the acoustic model, traffic proximity remains positive at all three scales and is significant at 800 m (p = 0.038); tree canopy remains negative at all three scales; and wind, precipitation, and temperature remain non-predictive of sound level regardless of radius. In the air model, the meteorological dominance is essentially invariant to radius: wind speed is the strongest predictor at every scale (p on the order of 10⁻²⁷ or smaller) and precipitation and temperature remain significant throughout, while no business or land-use count becomes a meaningful predictor at any radius.

One predictor is scale-dependent and we report it plainly. The association between industrial land and sound level is clearest at 400 m (1.72 dBA per SD, p = 0.032), attenuates at 250 m (0.85, p = 0.23), and is intermediate at 800 m (1.46, p = 0.099). This is consistent with a real but spatially localized industrial signal that is best captured at an intermediate radius: too small a buffer omits nearby sources, while too large a buffer dilutes the signal across area that does not contribute to the sound field at the site. The qualitative argument of the paper, that sound level is structured by the built environment while PM2.5 is not, does not rest on the industrial term alone and holds across all three radii.

**Supplementary Table S2.** Standardized coefficients and p-values for both models with radius-defined predictors evaluated at 250 m, 400 m, and 800 m. Distance, point-traffic, and weather predictors have no radius and are held fixed.

| **Model** | **Predictor** | **250m β (p)** | **400m β (p)** | **800m β (p)** |
| --- | --- | --- | --- | --- |
| Acoustic | Auto-body dist | 0.701 (0.276) | 0.568 (0.399) | 0.46 (0.526) |
| Acoustic | Bars/drinking (400m) | -0.921 (0.212) | -0.955 (0.38) | -1.52 (0.429) |
| Acoustic | Fuel dist (nearest) | -0.975 (0.128) | -0.902 (0.179) | -0.51 (0.458) |
| Acoustic | Impervious % (400m) | 0.916 (0.194) | 0.955 (0.2) | 0.886 (0.341) |
| Acoustic | Industrial (400m) | 0.846 (0.233) | 1.724 (0.0319) | 1.457 (0.0985) |
| Acoustic | Nearest-road AADT | 0.782 (0.0988) | 0.836 (0.0763) | 0.519 (0.26) |
| Acoustic | Precipitation (day) | -0.224 (0.416) | -0.27 (0.326) | -0.302 (0.272) |
| Acoustic | Restaurants (400m) | 0.595 (0.469) | -0.278 (0.814) | 0.027 (0.989) |
| Acoustic | Temperature (day) | 0.122 (0.642) | 0.138 (0.599) | 0.147 (0.575) |
| Acoustic | Total business (400m) | 0.594 (0.334) | 0.526 (0.48) | 1.674 (0.135) |
| Acoustic | Traffic proximity | 1.027 (0.146) | 1.016 (0.0782) | 1.146 (0.0384) |
| Acoustic | Tree canopy % (400m) | -1.07 (0.13) | -1.355 (0.0718) | -1.218 (0.112) |
| Acoustic | TRI dist (nearest) | 0.025 (0.975) | 0.636 (0.486) | 0.201 (0.817) |
| Acoustic | TRI facilities (800m) | -0.317 (0.571) | -0.461 (0.519) | -0.875 (0.24) |
| Acoustic | Truck traffic (800m) | 0.391 (0.52) | 0.463 (0.398) | 0.009 (0.987) |
| Acoustic | Wind speed (day) | 0.39 (0.158) | 0.39 (0.157) | 0.406 (0.14) |
| Air | Auto-body dist | 0.029 (0.379) | 0.018 (0.597) | -0.028 (0.434) |
| Air | Bars/drinking (400m) | 0.012 (0.753) | 0.003 (0.961) | 0.039 (0.689) |
| Air | Fuel dist (nearest) | -0.037 (0.261) | -0.029 (0.4) | -0.016 (0.636) |
| Air | Impervious % (400m) | -0.032 (0.368) | -0.033 (0.393) | -0.046 (0.316) |
| Air | Industrial (400m) | 0.003 (0.938) | 0.007 (0.862) | -0.03 (0.498) |
| Air | Nearest-road AADT | 0.067 (0.00541) | 0.065 (0.00762) | 0.059 (0.0102) |
| Air | Precipitation (day) | 0.168 (2.1e-12) | 0.16 (1.5e-11) | 0.156 (2.65e-11) |
| Air | Restaurants (400m) | 0.074 (0.0795) | 0.061 (0.316) | -0.01 (0.918) |
| Air | Temperature (day) | 0.057 (0.00927) | 0.059 (0.00767) | 0.061 (0.00484) |
| Air | Total business (400m) | -0.024 (0.455) | -0.004 (0.923) | 0.099 (0.0798) |
| Air | Traffic proximity | 0.016 (0.646) | -0.046 (0.124) | -0.045 (0.101) |
| Air | Tree canopy % (400m) | -0.06 (0.0932) | -0.088 (0.0247) | -0.123 (0.00151) |
| Air | TRI dist (nearest) | 0.046 (0.276) | 0.021 (0.652) | 0.028 (0.509) |
| Air | TRI facilities (800m) | 0.018 (0.524) | -0.066 (0.0776) | -0.078 (0.0385) |
| Air | Truck traffic (800m) | -0.056 (0.084) | 0.029 (0.307) | -0.014 (0.644) |
| Air | Wind speed (day) | -0.27 (3.98e-27) | -0.276 (1.75e-28) | -0.283 (1.22e-30) |

**S3. Penalized regression**

To guard against overfitting given 16 predictors relative to 144 sites, both outcomes were collapsed to site-level means and refitted with the lasso, with the penalty chosen by ten-fold cross-validation. Supplementary Table S3 reports the coefficients retained at the cross-validated minimum (λ_min) and at the more conservative one-standard-error penalty (λ_1se), for both models.

The two outcomes behave in opposite ways under penalization, mirroring the main models. For the acoustic outcome, the predictors that survive at λ_1se are industrial land (0.44), traffic proximity (0.70), and tree canopy (−0.87): all three are built-environment terms, and they are exactly the variables identified as influential in the unpenalized model. For the air outcome, no built-environment spatial predictor survives at λ_1se; the only retained terms are meteorological (wind speed −0.05, precipitation 0.14) together with a negligible restaurant coefficient (0.016). In other words, when the model is forced to discard all but the most predictive variables, the acoustic model keeps the built environment and the air model keeps the weather. This is the result summarized in Table 3 of the main text, shown here in full.

**Supplementary Table S3.** Lasso coefficients at λ_min and λ_1se for both site-level models.

| **Model** | **Predictor** | **β at λ_min** | **β at λ_1se** |
| --- | --- | --- | --- |
| Acoustic (LAeq) | (Intercept) | 59.094 | 59.1 |
| Acoustic (LAeq) | Bars/drinking (400m) | 0 | 0 |
| Acoustic (LAeq) | Restaurants (400m) | 0 | 0 |
| Acoustic (LAeq) | Industrial (400m) | 0.725 | 0.436 |
| Acoustic (LAeq) | Fuel dist (nearest) | 0 | 0 |
| Acoustic (LAeq) | Auto-body dist | 0 | 0 |
| Acoustic (LAeq) | Total business (400m) | 0.165 | 0 |
| Acoustic (LAeq) | Traffic proximity | 1.1 | 0.697 |
| Acoustic (LAeq) | Nearest-road AADT | 0 | 0 |
| Acoustic (LAeq) | Truck traffic (800m) | 0 | 0 |
| Acoustic (LAeq) | TRI facilities (800m) | 0 | 0 |
| Acoustic (LAeq) | TRI dist (nearest) | 0 | 0 |
| Acoustic (LAeq) | Impervious % (400m) | 0.09 | 0 |
| Acoustic (LAeq) | Tree canopy % (400m) | -1.144 | -0.868 |
| Acoustic (LAeq) | Temperature (day) | 0 | 0 |
| Acoustic (LAeq) | Wind speed (day) | 0 | 0 |
| Acoustic (LAeq) | Precipitation (day) | 0 | 0 |
| Air (log PM2.5) | (Intercept) | 1.404 | 1.403 |
| Air (log PM2.5) | Bars/drinking (400m) | 0 | 0 |
| Air (log PM2.5) | Restaurants (400m) | 0.062 | 0.016 |
| Air (log PM2.5) | Industrial (400m) | 0 | 0 |
| Air (log PM2.5) | Fuel dist (nearest) | -0 | 0 |
| Air (log PM2.5) | Auto-body dist | 0 | 0 |
| Air (log PM2.5) | Total business (400m) | 0 | 0 |
| Air (log PM2.5) | Traffic proximity | -0.016 | 0 |
| Air (log PM2.5) | Nearest-road AADT | 0.029 | 0 |
| Air (log PM2.5) | Truck traffic (800m) | 0 | 0 |
| Air (log PM2.5) | TRI facilities (800m) | 0 | 0 |
| Air (log PM2.5) | TRI dist (nearest) | 0 | 0 |
| Air (log PM2.5) | Impervious % (400m) | 0 | 0 |
| Air (log PM2.5) | Tree canopy % (400m) | 0 | 0 |
| Air (log PM2.5) | Temperature (day) | -0.005 | 0 |
| Air (log PM2.5) | Wind speed (day) | -0.133 | -0.05 |
| Air (log PM2.5) | Precipitation (day) | 0.203 | 0.137 |

*(λ_min = 0.78 and λ_1se = 1.50 for the acoustic model; λ_min = 0.016 and λ_1se = 0.049 for the air model.)*

**S4. Spatial autocorrelation**

Residual spatial autocorrelation was assessed with Moran’s I, computed on site-aggregated residuals with neighbors defined by the five nearest sites (k = 5 nearest-neighbor adjacency, row-standardized weights). Supplementary Table S4 reports the observed statistic, its expectation under no autocorrelation, its variance, and the p-value for three residual sets: the acoustic model, the air model with a site random effect only, and the air model with the measurement-day random effect added.

The acoustic residuals show no spatial autocorrelation (I = 0.027, p = 0.23), indicating that the built-environment predictors and site effect already capture the relevant spatial structure. The air residuals do show significant clustering when only a site effect is included (I = 0.139, p = 0.001), but this clustering disappears once the measurement day is added to the model (I = 0.010, p = 0.36). The apparent spatial structure in air quality is therefore the footprint of shared daily weather across sites measured on the same days, not a fixed property of the locations: had the clustering reflected stable site differences, adding a day effect would not have removed it.

**Supplementary Table S4.** Moran’s I for model residuals (k = 5 nearest neighbors).

| **Residuals** | **Moran’s I** | **Expectation** | **Variance** | **p** |
| --- | --- | --- | --- | --- |
| Acoustic model residuals | 0.0274 | -0.007 | 0.0022 | 0.232 |
| Air model residuals (site RE only) | 0.1389 | -0.007 | 0.00227 | 0.00109 |
| Air model residuals (+ day RE) | 0.01 | -0.007 | 0.00225 | 0.36 |

**S5. Sensitivity to the repeated-measures structure**

Because each site contributes up to four measurements, the main models use a site random intercept to account for the repeated visits. To confirm that the findings are not an artifact of this repeated-measures structure, both outcomes were collapsed to a single mean per site (144 observations) and refitted with ordinary least squares using the same predictors. Supplementary Table S5 places the site-mean coefficients next to the mixed-model coefficients.

The two approaches agree closely. The coefficient signs match for the substantive predictors in both models, and the key terms retain their magnitude and significance: in the acoustic model, industrial land (1.88, p = 0.027), traffic proximity (1.15, p = 0.058), and tree canopy (−1.79, p = 0.022) are if anything slightly stronger under the site-mean specification; in the air model, wind speed (−0.18, p < 0.001) and precipitation (0.24, p < 0.001) remain the dominant predictors. The independence of the two outcomes and the contrast between built-environment and meteorological drivers are therefore not produced by the random-effects structure.

One coefficient behaves as expected under collapsing rather than as a discrepancy: daily temperature, which is significant for PM2.5 in the session-level model, loses significance and changes sign when measurements are averaged to the site level. This is anticipated, because temperature varies primarily across days rather than across sites, so averaging over each site’s visits removes most of its variation. The same logic explains why the day-varying meteorological signal is best estimated in the session-level model that retains the temporal structure, and it reinforces the main finding that PM2.5 is governed by time-varying rather than place-fixed factors.

**Supplementary Table S5.** Comparison of mixed-effects coefficients (with site random intercept) and site-mean ordinary least squares coefficients.

| **Model** | **Predictor** | **β mixed** | **p mixed** | **β site-mean OLS** | **p site-mean OLS** |
| --- | --- | --- | --- | --- | --- |
| Acoustic (LAeq) | Bars/drinking (400m) | -0.955 | 0.38 | -1.145 | 0.318 |
| Acoustic (LAeq) | Restaurants (400m) | -0.278 | 0.814 | -0.276 | 0.824 |
| Acoustic (LAeq) | Industrial (400m) | 1.724 | 0.0319 | 1.881 | 0.0265 |
| Acoustic (LAeq) | Fuel dist (nearest) | -0.902 | 0.179 | -0.709 | 0.315 |
| Acoustic (LAeq) | Auto-body dist | 0.568 | 0.399 | 0.891 | 0.211 |
| Acoustic (LAeq) | Total business (400m) | 0.526 | 0.48 | 0.421 | 0.6 |
| Acoustic (LAeq) | Traffic proximity | 1.016 | 0.0782 | 1.148 | 0.0575 |
| Acoustic (LAeq) | Nearest-road AADT | 0.836 | 0.0763 | 0.981 | 0.0482 |
| Acoustic (LAeq) | Truck traffic (800m) | 0.463 | 0.398 | 0.292 | 0.622 |
| Acoustic (LAeq) | TRI facilities (800m) | -0.461 | 0.519 | -0.619 | 0.412 |
| Acoustic (LAeq) | TRI dist (nearest) | 0.636 | 0.486 | 0.478 | 0.618 |
| Acoustic (LAeq) | Impervious % (400m) | 0.955 | 0.2 | 0.634 | 0.413 |
| Acoustic (LAeq) | Tree canopy % (400m) | -1.355 | 0.0718 | -1.794 | 0.0222 |
| Acoustic (LAeq) | Temperature (day) | 0.138 | 0.599 | 0.922 | 0.237 |
| Acoustic (LAeq) | Wind speed (day) | 0.39 | 0.157 | 0.402 | 0.679 |
| Acoustic (LAeq) | Precipitation (day) | -0.27 | 0.326 | 0.832 | 0.338 |
| Air (log PM2.5) | Bars/drinking (400m) | 0.003 | 0.961 | 0.001 | 0.984 |
| Air (log PM2.5) | Restaurants (400m) | 0.061 | 0.316 | 0.119 | 0.0753 |
| Air (log PM2.5) | Industrial (400m) | 0.007 | 0.862 | -0.006 | 0.892 |
| Air (log PM2.5) | Fuel dist (nearest) | -0.029 | 0.4 | -0.015 | 0.688 |
| Air (log PM2.5) | Auto-body dist | 0.018 | 0.597 | 0.007 | 0.851 |
| Air (log PM2.5) | Total business (400m) | -0.004 | 0.923 | -0.058 | 0.182 |
| Air (log PM2.5) | Traffic proximity | -0.046 | 0.124 | -0.057 | 0.0805 |
| Air (log PM2.5) | Nearest-road AADT | 0.065 | 0.00762 | 0.049 | 0.0649 |
| Air (log PM2.5) | Truck traffic (800m) | 0.029 | 0.307 | 0.024 | 0.45 |
| Air (log PM2.5) | TRI facilities (800m) | -0.066 | 0.0776 | -0.016 | 0.693 |
| Air (log PM2.5) | TRI dist (nearest) | 0.021 | 0.652 | 0.007 | 0.885 |
| Air (log PM2.5) | Impervious % (400m) | -0.033 | 0.393 | -0.022 | 0.596 |
| Air (log PM2.5) | Tree canopy % (400m) | -0.088 | 0.0247 | -0.047 | 0.255 |
| Air (log PM2.5) | Temperature (day) | 0.059 | 0.00767 | -0.049 | 0.238 |
| Air (log PM2.5) | Wind speed (day) | -0.276 | 1.75e-28 | -0.179 | 7.56e-4 |
| Air (log PM2.5) | Precipitation (day) | 0.16 | 1.5e-11 | 0.238 | 1.08e-6 |

**Supplementary Note**

C-weighted and unweighted sound levels A-, C-, and Z-weighted equivalent levels were recorded simultaneously at every site-session, so the choice of frequency weighting can be examined directly. Median level rose as more low-frequency energy was admitted: LAeq 59.0 dBA (IQR 54.2 to 64.5), LCeq 70.7 dB (65.9 to 74.5), and LZeq 74.4 dB (69.4 to 78.7). All three weightings showed the same place-bound structure as the A-weighted level reported in the main text: in an intercept-only model, between-site differences accounted for 54% of the variance in LAeq, 40% in LCeq, and 26% in LZeq (intraclass correlation across the 144 sites), confirming that sound level is a property of location regardless of weighting. The difference LCeq - LAeq, an index for low-frequency content, had a median of 10.6 dB across site-sessions (IQR 8.4-13.1), indicating that the soundscape was broadly dominated by low-frequency energy. Site-mean gaps ranged from 1.5 to 23.8 dB, and the gap showed modest between-site structure (about 36% of its variance was between sites), but it did not track traffic: it was near zero with heavy-truck counts (Spearman ρ = -0.12) and only weakly and negatively associated with automobile counts (ρ = -0.31) and with overall level (ρ = -0.47), the gap being largest at the quietest sites. Thus while both the level and the spectral balance of the acoustic environment vary from place to place, it is the overall level that rises with traffic and the built environment; the low-frequency dominance is a pervasive background characteristic rather than a signature of nearby sources, reinforcing that the spatial structure of the acoustic environment is carried by its level.
